# Supplementary material for: Metal–organic framework-based oxygen carriers with antioxidant activity resulting from the incorporation of gold nanozymes
Source: Royal Society of Chemistry journal article supplement (doi:10.1039/d2bm01405j), 2023-01-01
Supplement: d2bm01405j1.pdf [file d2bm01405j1.pdf]

Supporting Information

# Metal-Organic Framework-Based Oxygen Carriers with Antioxidant Activity Resulting from the Incorporation of Gold Nanozymes

Xiaoli Liu<sup>†</sup>, Nancy Patricio Domingues<sup>‡</sup>, Emad Oveisi<sup>‡</sup>, Clara Coll-Satue<sup>†</sup>, Michelle Maria Theresia Jansman<sup>†</sup>, Berend Smit<sup>‡</sup>, Leticia Hosta-Rigau<sup>†\*</sup>

<sup>†</sup> DTU Health Tech, Center for Nanomedicine and Theranostics, Technical University of Denmark, Nils Koppels Allé, Building423, 2800 Kgs. Lyngby, Denmark

<sup>‡</sup> Laboratory of Molecular Simulation (LSMO), Institute of Chemical Sciences and Engineering (ISIC), École Polytechnique Fédérale de Lausanne (EPFL)-Valais, CH-1950 Sion, Switzerland

<sup>‡</sup> Interdisciplinary Centre for Electron Microscopy (CIME), École Polytechnique Fédérale de Lausanne (EPFL), CH-1015 Lausanne, Switzerland

*\*Correspondence: leri@dtu.dk; Tel.: +45-4525-8155*

## KEYWORDS

Antioxidant activity, Blood substitutes, Gold Nanoparticles, Haemoglobin-based Oxygen Carriers, Metal-organic Frameworks, Nanozymes

**Table S1.** The formulation table for preparation of different nanoparticles (NPs) and nanocarriers (NCs).

| Sample                      | HAuCl <sub>4</sub><br>5.88 mM<br>( $\mu$ L) | NaBH <sub>4</sub><br>1 mg mL <sup>-1</sup><br>( $\mu$ L) | PVP<br>3.27 mg mL <sup>-1</sup><br>( $\mu$ L) | MQ<br>(mL) | MOF<br>1 mg mL <sup>-1</sup><br>(mL) | Hb<br>100 mg mL <sup>-1</sup><br>( $\mu$ L) | Au: NaBH <sub>4</sub> :<br>PVP monomer<br>(molar ratio) |
|-----------------------------|---------------------------------------------|----------------------------------------------------------|-----------------------------------------------|------------|--------------------------------------|---------------------------------------------|---------------------------------------------------------|
| Au-NP                       | 100                                         | 200                                                      | NA                                            | 9.7        | NA                                   | NA                                          | 1:10:NA                                                 |
| Au/P5-NP                    | 100                                         | 200                                                      | 100                                           | 9.6        | NA                                   | NA                                          | 1:10:5                                                  |
| Au/P10-NP                   | 100                                         | 200                                                      | 200                                           | 9.5        | NA                                   | NA                                          | 1:10:10                                                 |
| MOF-NP                      | NA                                          | NA                                                       | NA                                            | NA         | 1                                    | NA                                          | NA                                                      |
| Au10@MOF-NC                 | 10                                          | 20                                                       | 20                                            | 8.95       | 1                                    | NA                                          | 1:10:10                                                 |
| Au25@MOF-NC                 | 25                                          | 50                                                       | 50                                            | 8.875      | 1                                    | NA                                          | 1:10:10                                                 |
| Au50@MOF-NC                 | 50                                          | 100                                                      | 100                                           | 8.75       | 1                                    | NA                                          | 1:10:10                                                 |
| Au100@MOF-NC                | 100                                         | 200                                                      | 200                                           | 8.5        | 1                                    | NA                                          | 1:10:10                                                 |
| MOF <sup>Hb</sup> -NP       | NA                                          | NA                                                       | NA                                            | NA         | 1                                    | 20                                          | NA                                                      |
| Au10@MOF <sup>Hb</sup> -NC  | 10                                          | 20                                                       | 20                                            | 8.95       | 1                                    | 20                                          | 1:10:10                                                 |
| Au25@MOF <sup>Hb</sup> -NC  | 25                                          | 50                                                       | 50                                            | 8.875      | 1                                    | 20                                          | 1:10:10                                                 |
| Au50@MOF <sup>Hb</sup> -NC  | 50                                          | 100                                                      | 100                                           | 8.75       | 1                                    | 20                                          | 1:10:10                                                 |
| Au100@MOF <sup>Hb</sup> -NC | 100                                         | 200                                                      | 200                                           | 8.5        | 1                                    | 20                                          | 1:10:10                                                 |

**Table S2.** The ratios of NPs to cells used in the cell viability study.

| Concentration<br>( $\mu\text{g mL}^{-1}$ ) | Ratios of NPs:cells |       |
|--------------------------------------------|---------------------|-------|
|                                            | RAW 264.7           | HUVEC |
| 5                                          | 17:1                | 34:1  |
| 12.5                                       | 43:1                | 86:1  |
| 25                                         | 86:1                | 172:1 |
| 50                                         | 172:1               | 345:1 |
| 125                                        | 431:1               | 862:1 |

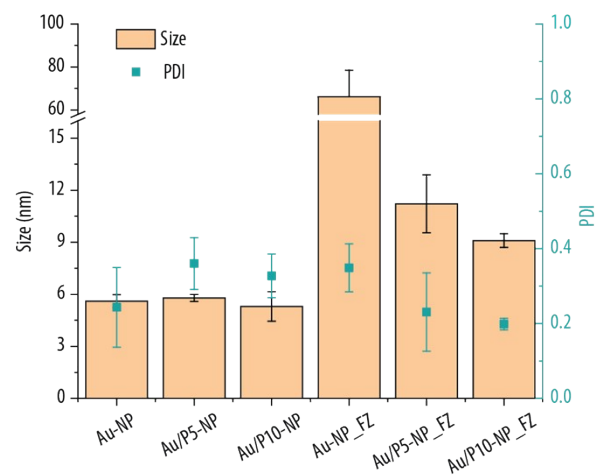

**Figure S1.** Size and polydispersity index (PDI) of the different suspensions of gold (Au) nanoparticles (NPs) when freshly prepared and re-suspended after freeze-drying (FZ).
